# Supplementary material for: Control of aggregation-induced emission versus fluorescence aggregation-caused quenching by bond existence at a single site in boron pyridinoiminate complexes
Source: Royal Society of Chemistry journal article supplement (doi:10.1039/c7qm00076f), 2017-01-01
Supplement: c7qm00076f1.pdf [file c7qm00076f1.pdf]

***Supporting Information for***

**Control of Aggregation-Induced Emission versus Fluorescence Aggregation-Caused  
Quenching by the Bond Existence at the Single Site in Boron Pyridinoiminate  
Complexes**

*Madoka Yamaguchi, Shunichiro Ito, Amane Hirose, Kazuo Tanaka\*, and Yoshiki Chujo\**

*Department of Polymer Chemistry, Graduate School of Engineering, Kyoto University, Katsura, Nishikyo-ku,  
Kyoto 615-8510, Japan*

*Corresponding authors E-mail: kazuo123@chujo.synchem.kyoto-u.ac.jp; chujo@chujo.synchem.kyoto-u.ac.jp*

*Tel: (+81)-75-383-2604. Fax: (+81)-75-383-2605*

## Experimental Section

**Measurements:**  $^1\text{H}$  (400 MHz),  $^{13}\text{C}$  (100 MHz), and  $^{11}\text{B}$  (128 MHz) NMR spectra were recorded on JEOL JNM-EX400 spectrometers. In  $^1\text{H}$  and  $^{13}\text{C}$  NMR spectra, tetramethylsilane (TMS) was used as an internal standard in  $\text{CDCl}_3$ , and  $^{11}\text{B}$  NMR spectra were referenced externally to  $\text{BF}_3\cdot\text{OEt}_2$  (sealed capillary). TGA was performed on an EXSTAR TG/DTA6220, Seiko Instrument, Inc., with the heating rate of  $10\text{ }^\circ\text{C}/\text{min}$  under nitrogen flowing ( $200\text{ mL}/\text{min}$ ). UV–vis spectra were recorded on a SHIMADZU UV-3600 spectrophotometer. Fluorescence emission spectra were measured with a HORIBA JOBIN YVON Fluoromax-4P spectrofluorometer. Cyclic voltammetry (CV) was carried out on a BAS ALS-Electrochemical-Analyzer Model 600D with a glassy carbon working electrode, a Pt counter electrode, an  $\text{Ag}/\text{Ag}^+$  reference electrode, and the ferrocene/ferrocenium external reference at a scan rate of  $0.05\text{ Vs}^{-1}$ . All reactions were performed under argon. Powder X-ray diffraction (XRD) patterns were taken by using  $\text{CuK}\alpha$  radiation with a Rigaku Miniflex. X-ray crystallographic analyses were carried out by a Rigaku R-AXIS RAPID-F graphite-monochromated  $\text{Mo K}\alpha$  radiation diffractometer with an imaging plate. A symmetry-related absorption correction was carried out by using the program ABSCOR.<sup>1</sup> The analysis was carried out with direct methods (SHELX97<sup>2</sup> or SIR92<sup>3</sup>) using Yadokari-XG<sup>4</sup>. The program ORTEP35 was used to generate the X-ray structural diagram<sup>5</sup>. DSC thermograms were carried out on a SII DSC 6220 instrument. The sample on the aluminum pan was heated at the rate of  $10\text{ }^\circ\text{C}/\text{min}$  under nitrogen flowing ( $30\text{ mL}/\text{min}$ ). Elemental analysis was performed at the Microanalytical Center of Kyoto University.

**Materials:** 2-Methylpyridine (Tokyo Kasei Kogyo, Co.), *N*-methoxy-*N*-methylbenzamide (Tokyo Kasei Kogyo, Co.), aniline (Wako Chemical, Co.), trifluoroacetic acid (Wako Chemical, Co.), 6(5*H*)-phenanthridinone (Tokyo Kasei Kogyo, Co.), phosphorus pentachloride (Tokyo Kasei Kogyo, Co.), *n*-butyllithium (1.64 mol/L in *n*-hexane, Kanto Chemical, Co., Inc.) and boron trifluoride diethyl etherate ( $\text{BF}_3\cdot\text{OEt}_2$ , Aldrich Chemical, Co.) were used as received. Tetrahydrofuran (THF) and triethylamine were

purified using a two-column solid-state purification system (Glasscoutour System, Joerg Meyer, Irvine, CA).

**Compound 1a.** *n*-Butyllithium (7.2 mL, 11.8 mmol) was added dropwise to the solution of 2-methylpyridine (1 g, 10.7 mmol) in THF (50 mL) at  $-78\text{ }^{\circ}\text{C}$  under argon atmosphere. The reaction mixture was stirred at  $-78\text{ }^{\circ}\text{C}$  for 1 h and subsequently at room temperature for 1 h. Next, *N*-methoxy-*N*-methylbenzamide (2.0 g, 10.7 mmol) in THF (50 mL) was added to the solution at  $-78\text{ }^{\circ}\text{C}$ . After stirring at room temperature for 12 h, the solution was poured into an excess amount of  $\text{CH}_2\text{Cl}_2$ . The solution was washed with brine three times and dried over anhydrous magnesium sulfate. After the solvent was removed by a rotary evaporator, the obtained product was purified by silica gel column chromatography (eluted with hexane/ethyl acetate = 3/2) to give pure **1a** as a yellow solid (1.52 g, 52%). In deuterated chloroform solution, the compound exists as a mixture of keto and enol tautomers.  $^1\text{H}$  NMR ( $\text{CDCl}_3$ ):  $\delta$  = 8.55 (1H, d,  $J$  = 4.2 Hz, Ar-*H*, ketone), 8.26 (1H, d,  $J$  = 5.1 Hz, Ar-*H*, enol), 8.05 (2H, dd,  $J$  = 8.0, 1.0 Hz, Ar-*H*, ketone), 7.84 (2H, tt,  $J$  = 6.6, 3.9 Hz, Ar-*H*, enol), 7.63–7.51 (4H, m, Ar-*H*, ketone+enol), 7.45–7.36 (4H, m, Ar-*H*, ketone+enol), 7.28 (1H, d,  $J$  = 3.9 Hz, Ar-*H*, ketone), 7.14 (1H, m, Ar-*H*, ketone), 7.04 (1H, d,  $J$  = 8.3 Hz, Ar-*H*, enol), 6.9 (1H, m, Ar-*H*, enol), 6.04 (1H, s,  $-\text{CH}=\text{}$ , enol), 4.48 (2H, s,  $-\text{CH}_2-$ , ketone) ppm.  $^{13}\text{C}$  NMR ( $\text{CDCl}_3$ ):  $\delta$  = 196.9, 164.3, 158.6, 155.3, 149.6, 144.3, 137.1, 136.6, 136.5, 133.3, 129.3, 128.8, 128.6, 128.3, 125.5, 124.2, 121.9, 121.6, 118.5, 94.2, 48.4 ppm. HRMS (ESI): Calcd for  $[\text{M}+\text{H}]^+$ , 198.0913; found,  $m/z$  198.0911.

**Compound 2a.** Aniline (0.7 g, 0.69 mL, 7.5 mmol) and trifluoroacetic acid (1 mL) were added to the solution of **1a** (1.5 g, 7.5 mmol) in toluene (30 mL) under argon atmosphere. The reaction mixture was refluxed for 3 h, and the generated water was removed using a Dean-Stark apparatus. After the solvent was removed by a rotary evaporator, the obtained product was poured into an excess amount of  $\text{CH}_2\text{Cl}_2$ . The solution was washed with saturated  $\text{NaHCO}_3$  solution three times and brine and dried over anhydrous

magnesium sulfate. After the solvent was removed by a rotary evaporator, the obtained product was purified by silica gel column chromatography (eluted with hexane/ethyl acetate = 3/1) to give pure **2a** as a yellow solid (1.5 g, 74%). <sup>1</sup>H NMR (CDCl<sub>3</sub>): δ = 11.7 (1H, s, -NH-), 7.78 (1H, d, *J* = 3.9 Hz, Ar-*H*), 7.50–7.45 (3H, m, Ar-*H*), 7.29–7.25 (3H, m, Ar-*H*), 7.06–7.02 (3H, m, Ar-*H*), 6.86 (1H, m, Ar-*H*), 6.78 (1H, t, *J* = 14.6 Hz, Ar-*H*), 6.68 (2H, d, *J* = 7.8 Hz, Ar-*H*), 5.57 (1H, s, -CH=) ppm. <sup>13</sup>C NMR (CDCl<sub>3</sub>): δ = 158.6, 148.4, 147.3, 142.4, 138.2, 135.9, 128.5, 128.3, 128.2, 128.0, 122.9, 120.9, 120.8, 118.4, 103.5 ppm. HRMS (NSI): Calcd for [M+H]<sup>+</sup>, 273.1386; found, *m/z* 273.1382.

**BPI.** BF<sub>3</sub>·OEt<sub>2</sub> (6.8 mL, 7.8 g, 55.1 mmol) and triethylamine (7.7 mL, 5.6 g, 55.1 mmol) were added to the solution of **2a** (1.5 g, 5.5 mmol) in toluene (30 mL) at ambient temperature, and the solution was stirred at 100 °C for 12 h. After precipitates were removed by filtration, the solvent was removed by a rotary evaporator. The obtained product was purified by silica gel column chromatography (eluted with hexane/ethyl acetate = 3/1). The product was purified by recrystallization from methanol. The precipitate collected by filtration was dried *in vacuo* to give pure **BPI** as a yellow crystal (1.3 g, 25%). <sup>1</sup>H NMR (CDCl<sub>3</sub>): δ = 8.33 (1H, d, *J* = 6.1 Hz, Ar-*H*), 7.69 (1H, m, Ar-*H*), 7.30–7.25 (2H, m, Ar-*H*), 7.20–7.16 (4H, m, Ar-*H*), 7.13–7.09 (2H, m, Ar-*H*), 7.06–7.04 (3H, m, Ar-*H*), 6.99 (1H, m, Ar-*H*), 5.71 (1H, s, -CH=) ppm. <sup>13</sup>C NMR (CDCl<sub>3</sub>): δ = 157.5, 151.0, 142.8, 138.7, 138.6, 137.6, 129.1, 128.6, 128.1, 127.9, 127.7, 124.7, 122.1, 117.1, 95.5 ppm. <sup>11</sup>B NMR (CDCl<sub>3</sub>): δ = 1.95 (t, *J* = 31.3 Hz) ppm. HRMS (ESI): Calcd for [M+H]<sup>+</sup>, 321.1369; found, *m/z* 321.1364. Anal. Calcd for C<sub>19</sub>H<sub>15</sub>BF<sub>2</sub>N<sub>2</sub>: C, 71.28; H, 4.72; N, 8.75. Found: C, 71.12; H, 4.65; N, 8.70.

**Compound 1b.** Phosphorus pentachloride (6.2 g, 29.9 mmol) was added to the solution of 6(5*H*)-phenanthridinone (5.3 g, 27.2 mmol) in toluene (60 mL). The reaction mixture was stirred under argon atmosphere at 100 °C for 24 h. After the solution was cooled to ambient temperature, the solvent was removed by vacuum distillation. Sodium hydrogen carbonate and toluene were added to the residue for

neutralization. Precipitates were removed by filtration, and then the solvent was removed by a rotary evaporator to give desired product **1b** as a pale yellow solid (1.4 g, 86%). The product was used for the next reaction without further purification.

**Compound 2b.** *n*-Butyllithium (15.3 mL, 23.6 mmol) was added dropwise to the solution of 2-methylpyridine (2 g, 21.5 mmol) in THF (50 mL) at  $-78\text{ }^{\circ}\text{C}$  under argon atmosphere. The reaction mixture was stirred at  $-78\text{ }^{\circ}\text{C}$  for 1 h and additionally at room temperature for 2 h. Next, **1b** (4.6 g, 21.5 mmol) in THF (50 mL) was added to the solution at  $-78\text{ }^{\circ}\text{C}$ . After stirring at room temperature for 12 h, the solution was poured into an excess amount of  $\text{CH}_2\text{Cl}_2$ . The solution was washed with brine three times and dried over anhydrous magnesium sulfate. After the solvent was removed by a rotary evaporator, the obtained product was purified by silica gel column chromatography (eluted with hexane/ethyl acetate = 1/1) to give pure **2b** as a yellow solid. (1.7 g, 29%).  $^1\text{H}$  NMR ( $\text{CDCl}_3$ ):  $\delta = 8.54\text{--}8.45$  (3H, m, Ar-*H*), 8.32 (1H, d,  $J = 8.3$  Hz, Ar-*H*), 8.18 (1H, d,  $J = 8.0$  Hz, Ar-*H*), 7.71–7.67 (2H, m, Ar-*H*), 7.11 (2H, tt,  $J = 19.8, 15.4$  Hz, Ar-*H*), 7.41 (1H, t,  $J = 13.9$  Hz, Ar-*H*), 7.19 (1H, d,  $J = 8.0$  Hz, Ar-*H*), 7.02 (1H, t,  $J = 12.2$  Hz, Ar-*H*), 4.93 (2H, s,  $-\text{CH}_2-$ ) ppm.  $^{13}\text{C}$  NMR ( $\text{CDCl}_3$ ):  $\delta = 159.1, 159.1, 149.1, 143.6, 136.3, 133.0, 130.2, 129.7, 128.5, 127.2, 127.2, 126.6, 125.4, 123.8, 123.1, 122.1, 121.8, 121.3, 46.2$  ppm. HRMS (ESI): Calcd for  $[\text{M}+\text{H}]^+$ , 271.1230; found,  $m/z$  271.1223.

**FBPI.**  $\text{BF}_3\cdot\text{OEt}_2$  (5.5 mL, 6.3 g, 44.4 mmol) and triethylamine (6.2 mL, 4.5 g, 44.4 mmol) were added to the solution of **2b** (1.2 g, 4.4 mmol) in toluene (50 mL) at ambient temperature, and the solution was stirred at  $100\text{ }^{\circ}\text{C}$  for 12 h. After precipitates were removed by filtration, the solvent was removed by a rotary evaporator. The obtained product was dissolved in a small amount of  $\text{CHCl}_3$ , and then the product was reprecipitated from methanol. The product was purified by recrystallization from  $\text{CHCl}_3$  and hexane. The precipitate collected by filtration was dried in vacuum to give pure **FBPI** as a red crystal (1.2 g, 90%).  $^1\text{H}$  NMR ( $\text{CDCl}_3$ ):  $\delta = 8.40$  (1H, m, Ar-*H*), 8.27–8.22 (2H, m, Ar-*H*), 8.18 (1H, d,  $J = 8.2$  Hz, Ar-*H*), 8.14

(1H, d,  $J = 8.6$  Hz, Ar-*H*), 7.64 (1H, t,  $J = 15.4$  Hz, Ar-*H*), 7.54–7.45 (3H, m, Ar-*H*), 7.25 (1H, t,  $J = 15.1$  Hz, Ar-*H*), 7.07 (1H, d,  $J = 8.0$  Hz, Ar-*H*), 6.84 (1H, t,  $J = 13.4$  Hz, Ar-*H*), 6.28 (1H, s, -CH=) ppm.  $^{13}\text{C}$  NMR ( $\text{CDCl}_3$ ):  $\delta = 149.8, 147.5, 138.6, 138.0, 137.7, 131.8, 131.1, 129.4, 129.29, 127.9, 125.6, 125.5, 124.8, 123.0, 122.2, 121.6, 121.2, 114.8, 85.4$  ppm.  $^{11}\text{B}$  NMR ( $\text{CDCl}_3$ ):  $\delta = 3.23$  (t,  $J = 37.5$  Hz) ppm. HRMS (ESI): Calcd for  $[\text{M}+\text{H}]^+$ , 319.1213; found,  $m/z$  319.1204. Anal. Calcd for  $\text{C}_{19}\text{H}_{13}\text{BF}_2\text{N}_2$ : C, 71.73; H, 4.12; N, 8.81. Found: C, 71.62; H, 4.14; N, 8.69.

(a)

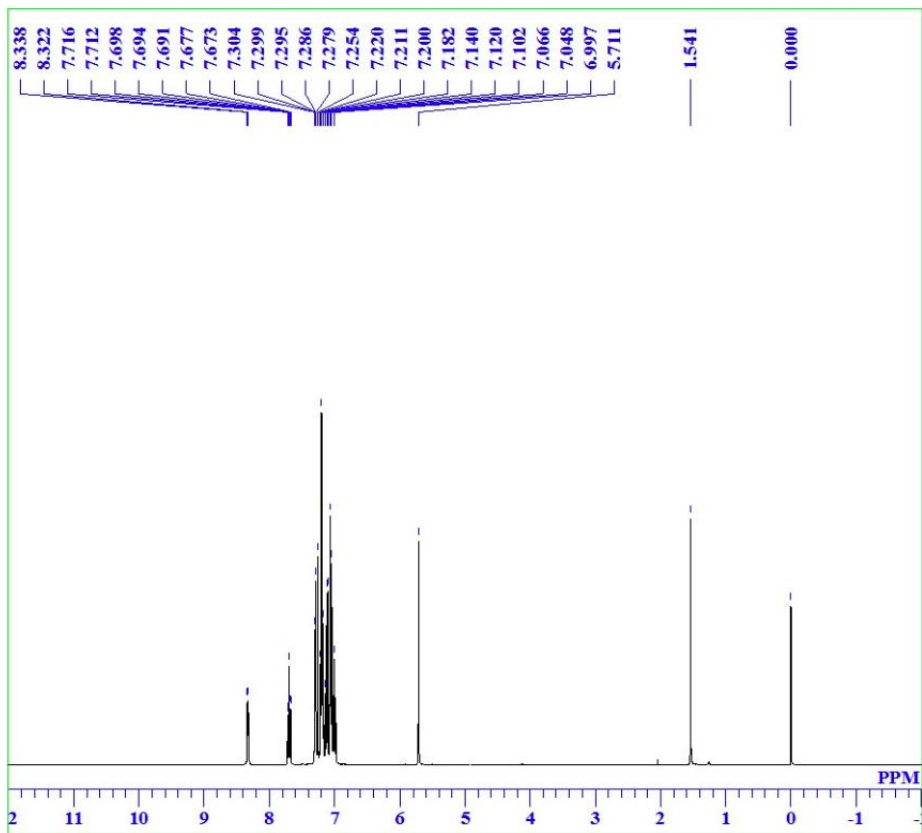

(b)

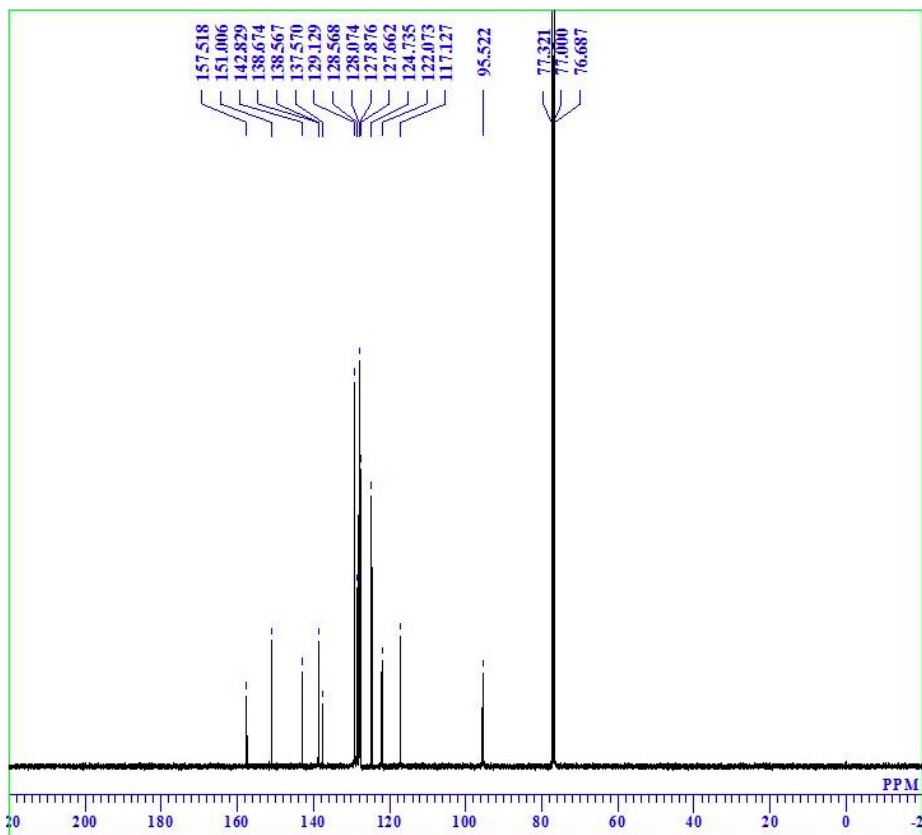

(c)

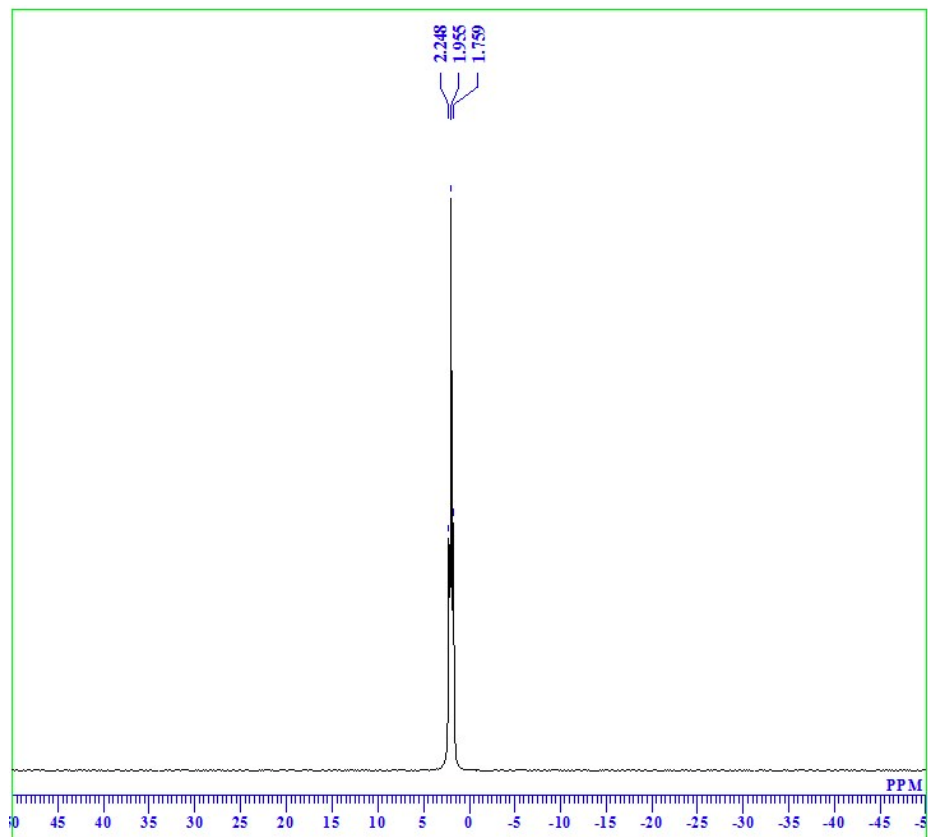

**Figure S1.** (a)  $^1\text{H}$ , (b)  $^{13}\text{C}$  and (c)  $^{11}\text{B}$  NMR spectra of **BPI** in  $\text{CDCl}_3$ .



(a)

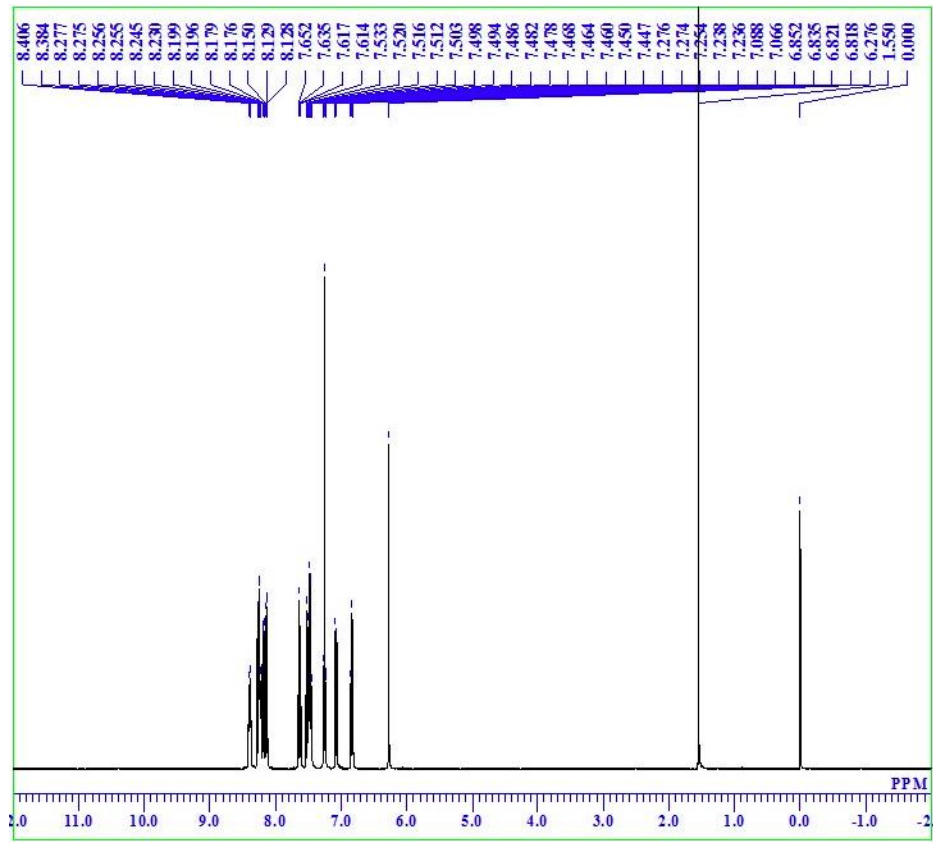

(b)

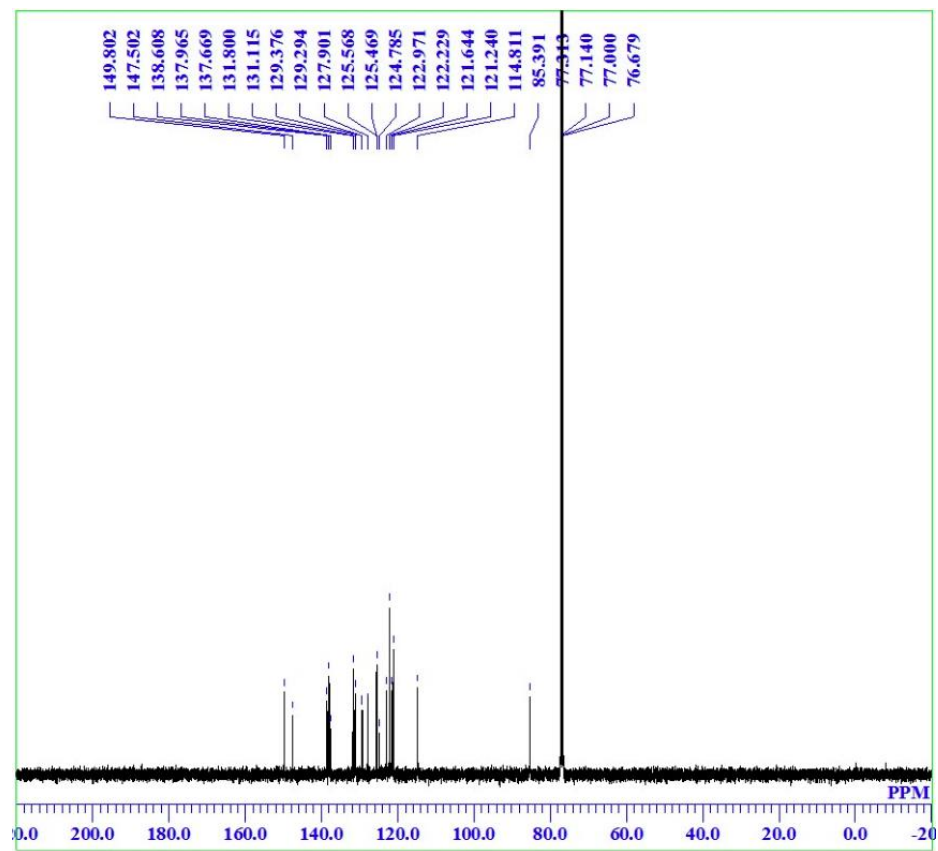

(c)

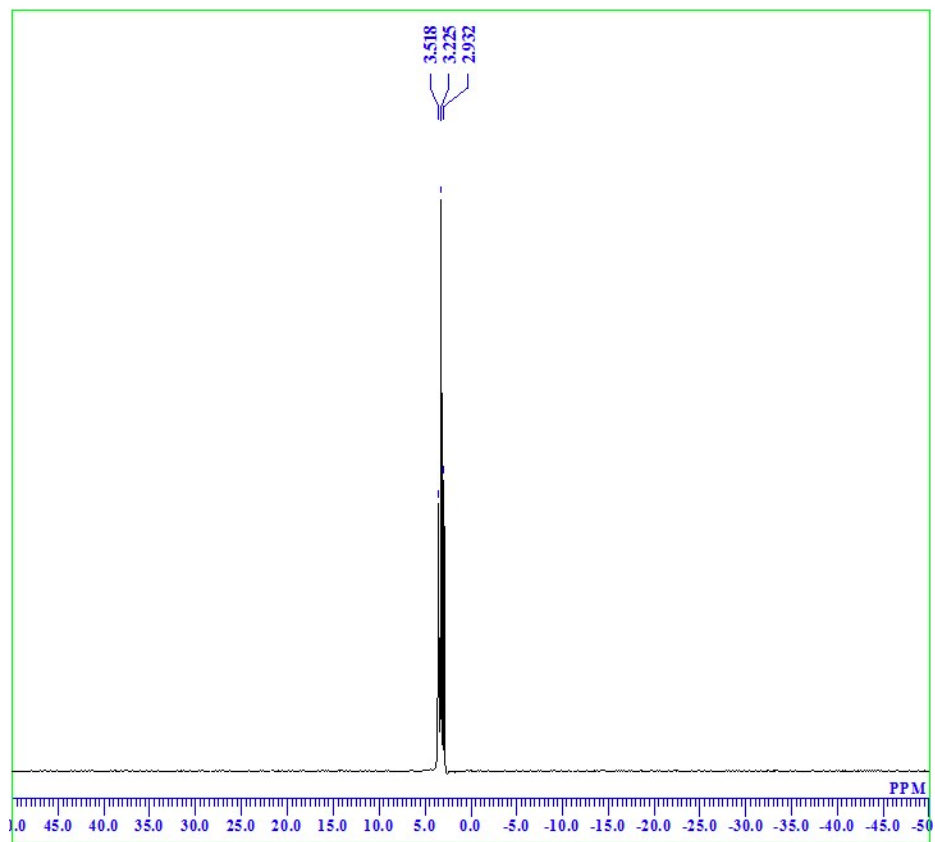

**Figure S2.** (a)  $^1\text{H}$ , (b)  $^{13}\text{C}$  and (c)  $^{11}\text{B}$  NMR spectra of **FBPI** in  $\text{CDCl}_3$ .

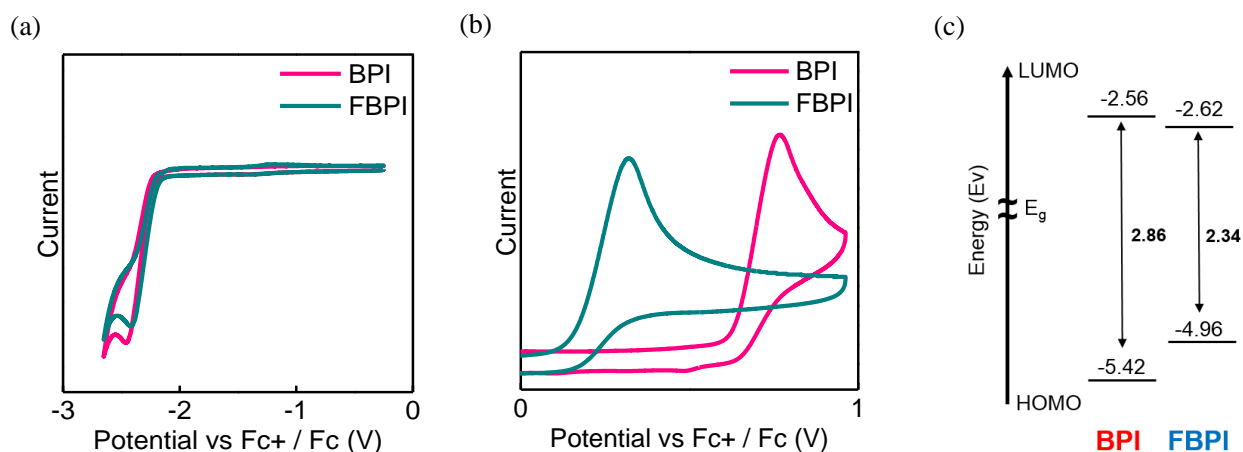

**Figure S3.** Cyclic voltammograms of **BPI** and **FBPI** from (a) 0 V to -2.4 V (b) 0 V to 1.2 V in  $\text{CH}_2\text{Cl}_2$  ( $1.0 \times 10^{-3}$  M) with 0.1 M  $\text{Bu}_4\text{NPF}_6$  as a supporting electrolyte,  $\text{AgCl}/\text{Ag}$  as a reference electrode, Pt as working and counter electrodes, and scan rate at 100 mV/s. (c) Energy diagrams of **BPI** and **FBPI** calculated by CV measurements.

**Table S1.** Electrochemical results with **BPI** and **FBPI** from CV measurements

|             | $E_{\text{Ox}}^a$<br>[V] | $E_{\text{red}}^b$<br>[V] | HOMO <sup>c</sup><br>[eV] | LUMO <sup>d</sup><br>[eV] |
|-------------|--------------------------|---------------------------|---------------------------|---------------------------|
| <b>BPI</b>  | 0.62                     | -2.24                     | -5.42                     | -2.56                     |
| <b>FBPI</b> | 0.16                     | -2.18                     | -4.96                     | -2.62                     |

<sup>a</sup>  $E_{\text{Ox}}$  is the onset potential of first oxidation wave.

<sup>b</sup>  $E_{\text{red}}$  is the onset potential of first reduction wave.

<sup>c</sup> Calculated from the empirical formula<sup>6</sup>,  $\text{HOMO} = -E_{\text{Ox}} - 4.80$  (eV).

<sup>d</sup> Calculated from the empirical formula<sup>6</sup>,  $\text{LUMO} = -E_{\text{red}} - 4.80$  (eV).

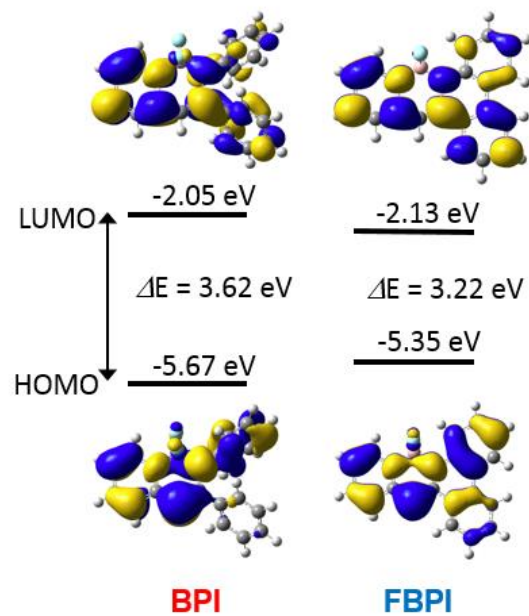

**Figure S4.** Structures and molecular orbital diagrams for the LUMO and HOMO of **BPI** and **FBPI** ((B3LYP/6-31G+ (d, p)//B3LYP/6-31G+ (d, p))).

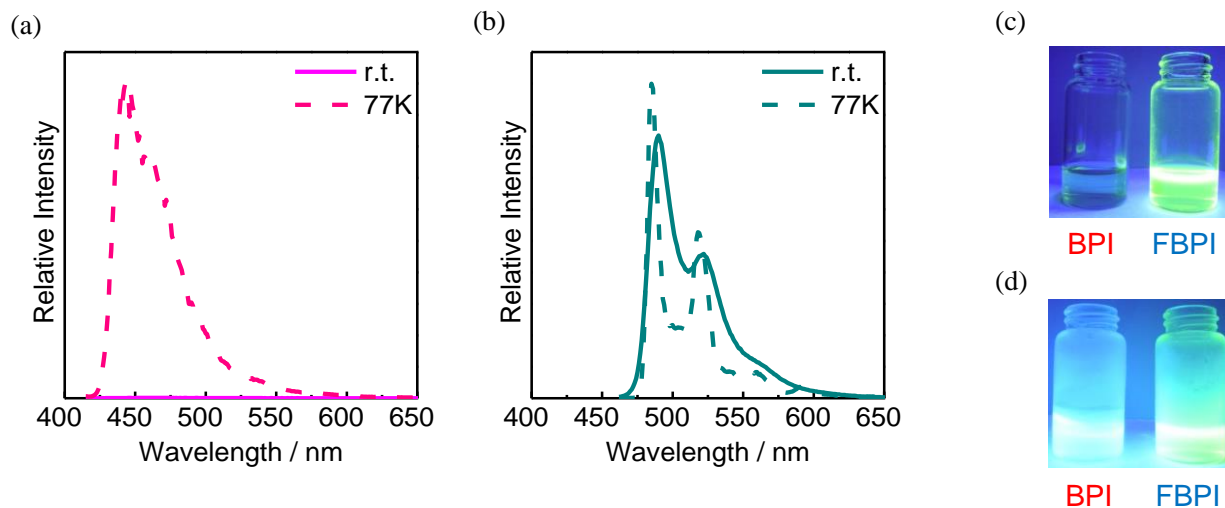

**Figure S5.** PL spectra of (a) **BPI** and (b) **FBPI** in 2-Me-THF ( $1.0 \times 10^{-5}$  M) at r.t. (solid line) and at 77 K (dashed line). (c) Photographs of **BPI** and **FBPI** in 2-Me-THF ( $1.0 \times 10^{-5}$  M) at r.t. under UV irradiation. (d) Photographs of **BPI** and **FBPI** in 2-Me-THF ( $1.0 \times 10^{-5}$  M) at 77 K under UV irradiation.

**Table S2.** PL properties of **BPI** and **FBPI** in 2-Me-THF ( $1.0 \times 10^{-5}$  M)

|             | $\lambda_{\text{PL, r.t.}}$<br>[nm] | $\lambda_{\text{PL, 77K}}$<br>[nm] |
|-------------|-------------------------------------|------------------------------------|
| <b>BPI</b>  | 459                                 | 443                                |
| <b>FBPI</b> | 490                                 | 485                                |

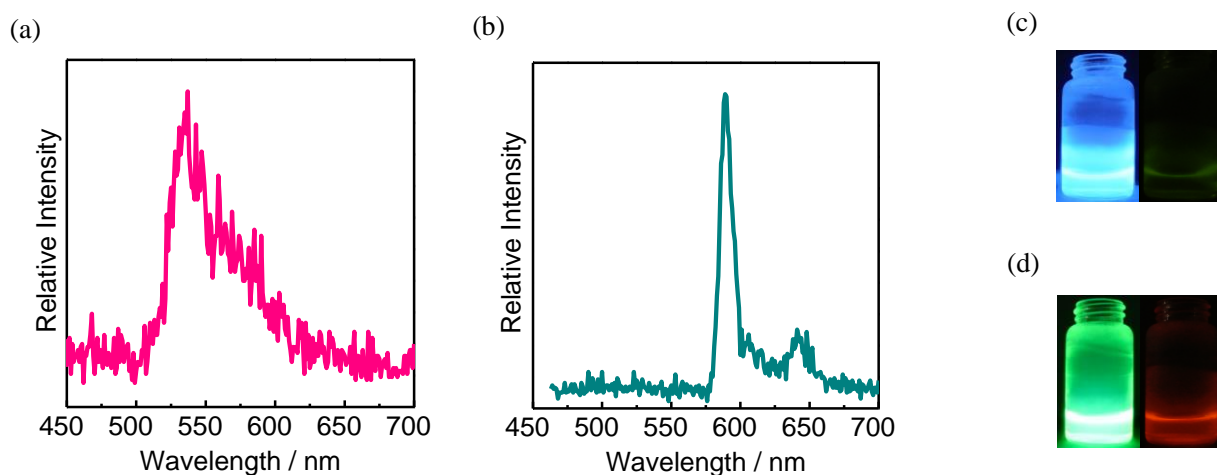

**Figure S6.** PL spectra of (a) **BPI** and (b) **FBPI** in 2-Me-THF ( $1.0 \times 10^{-5}$  M) at 77 K delayed after 1 ms. (c) Photographs of **BPI** in 2-Me-THF ( $1.0 \times 10^{-5}$  M) at 77K under UV irradiation and immediately after tuning off UV irradiation. (d) Photographs of **FBPI** in 2-Me-THF ( $1.0 \times 10^{-5}$  M) at 77 K under UV irradiation and immediately after tuning off UV irradiation.

**Table S3.** Phosphorescence properties of **BPI** and **FBPI** in 2-Me-THF ( $1.0 \times 10^{-5}$  M) at 77K

|             | $\lambda_{\text{PL}}$<br>[nm] |
|-------------|-------------------------------|
| <b>BPI</b>  | 537                           |
| <b>FBPI</b> | 589                           |

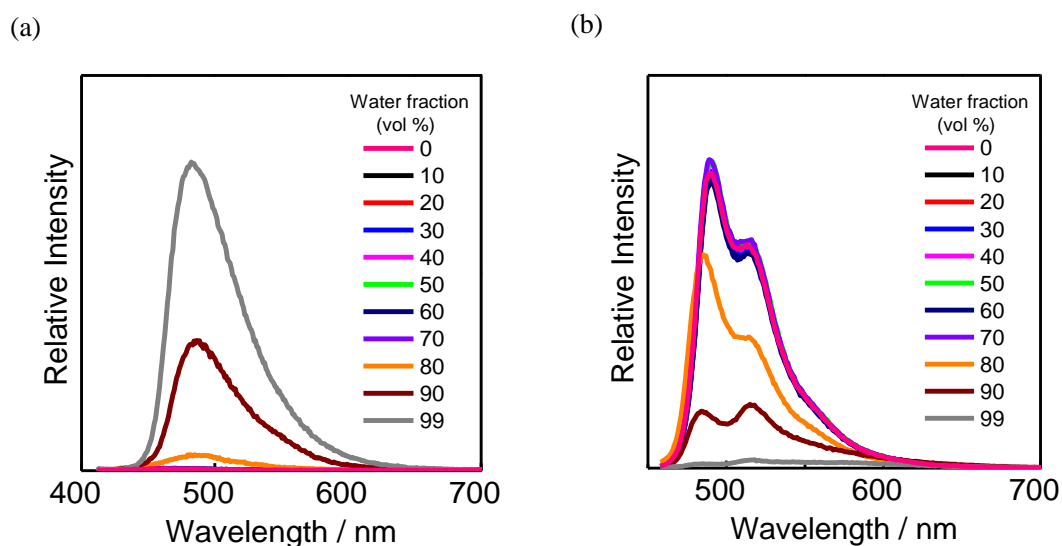

**Figure S7.** PL spectra of (a) **BPI** and (b) **FBPI** in acetonitrile / H<sub>2</sub>O mixture solvents ( $1.0 \times 10^{-4}$  M).

*Front view*

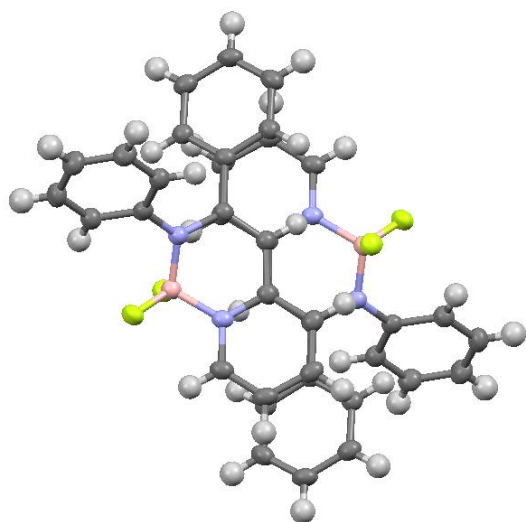

*Side view*

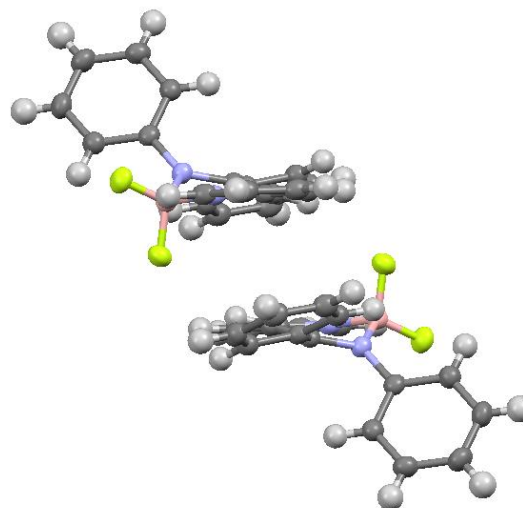

*Packing structure*

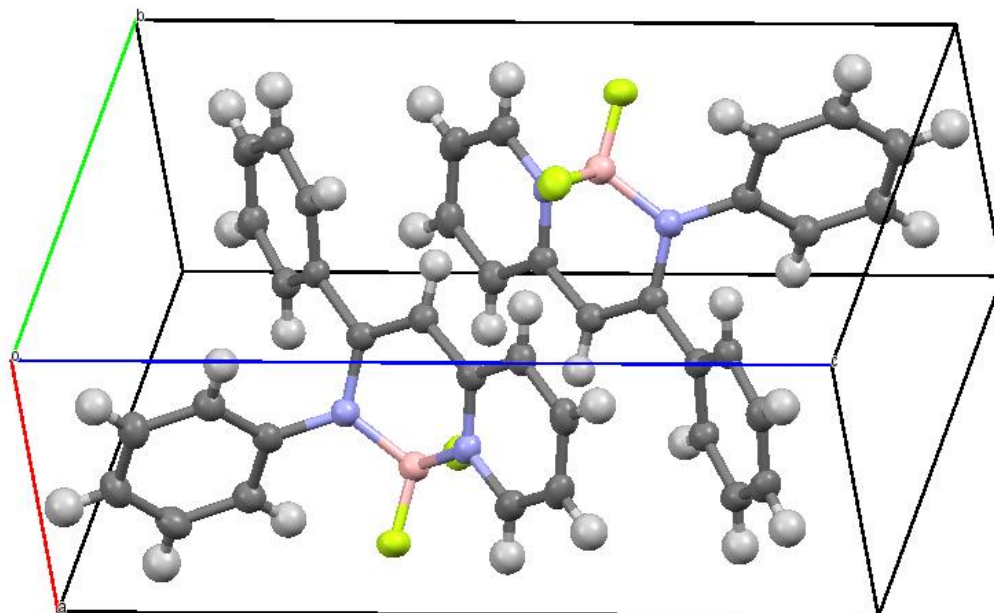

**Figure S8.** ORTEP drawings of the **BPI** dimer and the packing structures.

**Table S4.** Crystallographic data of **BPI**<sup>a</sup>

|                                                     |                                                                                                                           |
|-----------------------------------------------------|---------------------------------------------------------------------------------------------------------------------------|
| Empirical formula                                   | C <sub>19</sub> H <sub>15</sub> BF <sub>2</sub> N <sub>2</sub>                                                            |
| Formula weight                                      | 320.14                                                                                                                    |
| Temperature (K)                                     | 93(2)                                                                                                                     |
| Wavelength (Å)                                      | 0.71075                                                                                                                   |
| Crystal system, space group                         | triclinic, <i>P</i> -1                                                                                                    |
| Unit cell dimensions                                | $a = 6.418(3)$<br>$b = 8.632(4)$<br>$c = 14.198(6)$<br>$\alpha = 74.951(6)$<br>$\beta = 81.658(7)$<br>$\gamma = 751.3(6)$ |
| $V$ (Å <sup>3</sup> )                               | 751.3(6)                                                                                                                  |
| Z, calculated density (Mg m <sup>-3</sup> )         | 2, 1.415                                                                                                                  |
| Absorption coefficient                              | 0.100                                                                                                                     |
| $F(000)$                                            | 332                                                                                                                       |
| Crystal size (mm)                                   | 0.10 × 0.10 × 0.10                                                                                                        |
| $\theta$ range for data collection                  | 3.175 –27.485                                                                                                             |
| Limiting indices                                    | $-8 \leq h \leq 8, -10 \leq k \leq 11, -17 \leq l \leq 18$                                                                |
| Reflections collected (unique)                      | 6456/3230 [ $R(\text{int}) = 0.0818$ ]                                                                                    |
| Completeness to $\theta = 27.48$                    | 0.985                                                                                                                     |
| Goodness-of-fit on $F^2$                            | 1.036                                                                                                                     |
| Final $R$ indices [ $I > 2\sigma(I)$ ] <sup>b</sup> | $R_1 = 0.0596, wR_2 = 0.1541$                                                                                             |
| $R$ indices (all data)                              | $R_1 = 0.0713, wR_2 = 0.1623$                                                                                             |

<sup>a</sup> The structures were solved by direct method (SIR97) and refined by full-matrix least-squares procedures based on  $F^2$  (SHELX-97). <sup>b</sup>  $R_1 = \Sigma(|F_0| - |F_c|) / \Sigma|F_0|$ .  $wR_2 = [\Sigma w(F^2_0 - F^2_c)^2 / \Sigma w(F^2_0)^2]^{1/2}$ .  $w = 1 / [\sigma^2(F^2_0) + (ap)^2 + bp]$ , where  $p = [\max(F^2_0, 0) + 2F^2_c] / 3$ .



*Front view*

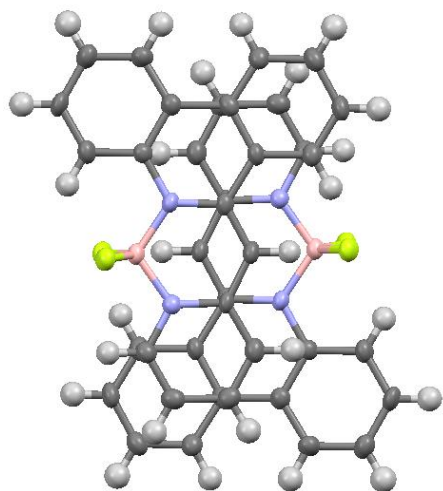

*Side view*

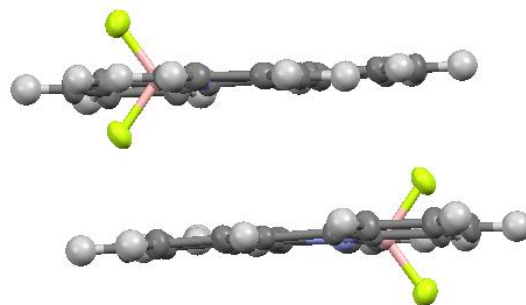

*Packing structure*

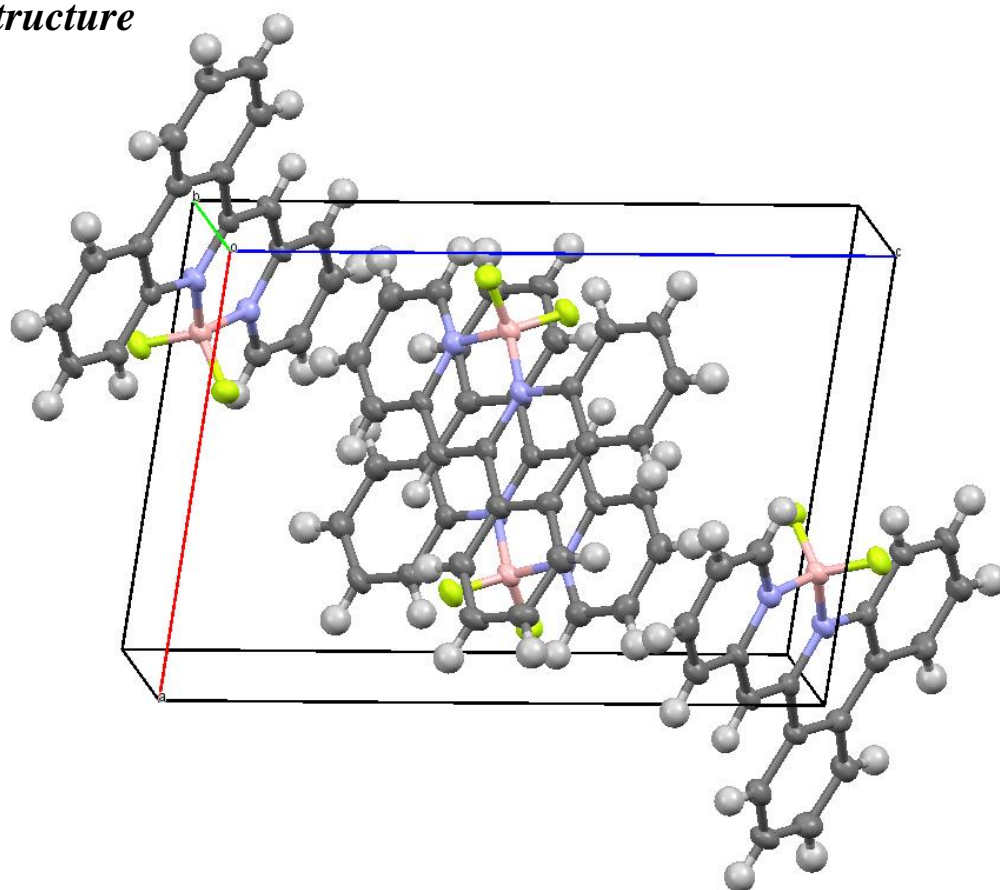

**Figure S9.** ORTEP drawings of the **FBPI** dimer and the packing structures.

**Table S5.** Crystallographic data of **FBPI**<sup>a</sup>

|                                                                  |                                                                                                                                   |
|------------------------------------------------------------------|-----------------------------------------------------------------------------------------------------------------------------------|
| Empirical formula                                                | C <sub>19</sub> H <sub>13</sub> BF <sub>2</sub> N <sub>2</sub>                                                                    |
| Formula weight                                                   | 318.12                                                                                                                            |
| Temperature (K)                                                  | 93(2)                                                                                                                             |
| Wavelength (Å)                                                   | 0.71075                                                                                                                           |
| Crystal system, space group                                      | monoclinic, <i>P</i> 2 <sub>1</sub> / <i>n</i>                                                                                    |
| Unit cell dimensions                                             | <i>a</i> = 9.2376(8)<br><i>b</i> = 11.5433(11)<br><i>c</i> = 13.4497(11)<br>$\alpha$ = 90<br>$\beta$ = 98.264(7)<br>$\gamma$ = 90 |
| <i>V</i> (Å <sup>3</sup> )                                       | 1419.3(2)                                                                                                                         |
| Z, calculated density (Mg m <sup>-3</sup> )                      | 4, 1.489                                                                                                                          |
| Absorption coefficient                                           | 0.106                                                                                                                             |
| <i>F</i> (000)                                                   | 656                                                                                                                               |
| Crystal size (mm)                                                | 0.10 × 0.10 × 0.10                                                                                                                |
| $\theta$ range for data collection                               | 3.061 – 27.477                                                                                                                    |
| Limiting indices                                                 | -10 ≤ <i>h</i> ≤ 11, -14 ≤ <i>k</i> ≤ 14, -17 ≤ <i>l</i> ≤ 17                                                                     |
| Reflections collected (unique)                                   | 13004/5674 [ <i>R</i> (int) = 0.0646]                                                                                             |
| Completeness to theta = 27.48                                    | 0.996                                                                                                                             |
| Goodness-of-fit on <i>F</i> <sup>2</sup>                         | 1.087                                                                                                                             |
| Final <i>R</i> indices [ <i>I</i> > 2σ( <i>I</i> )] <sup>b</sup> | <i>R</i> <sub>1</sub> = 0.0490, w <i>R</i> <sub>2</sub> = 0.1448                                                                  |
| <i>R</i> indices (all data)                                      | <i>R</i> <sub>1</sub> = 0.0627, w <i>R</i> <sub>2</sub> = 0.1720                                                                  |

<sup>a</sup> The structures were solved by direct method (SIR97) and refined by full-matrix least-squares procedures based on *F*<sup>2</sup> (SHELX-97). <sup>b</sup>  $R_1 = \Sigma(|F_0| - |F_c|) / \Sigma|F_0|$ .  $wR_2 = [\Sigma w(F^2_0 - F^2_c)^2 / \Sigma w(F^2_0)^2]^{1/2}$ .  $w = 1 / [\sigma^2(F^2_0) + (ap)^2 + bp]$ , where  $p = [\max(F^2_0, 0) + 2F^2_c] / 3$ .

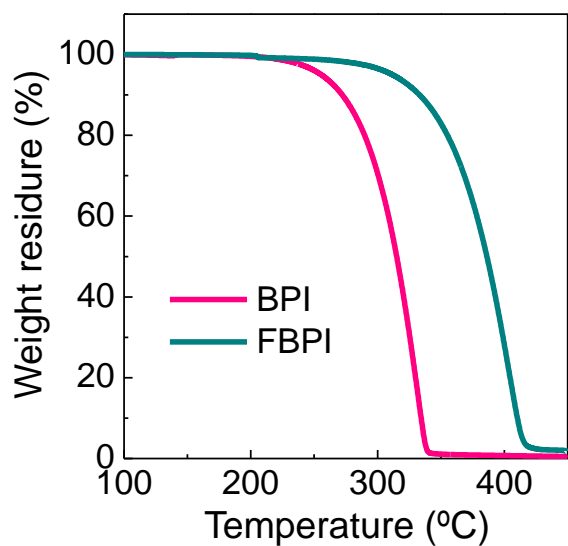

**Figure S10.** TGA profiles of **BPI** and **FBPI**.

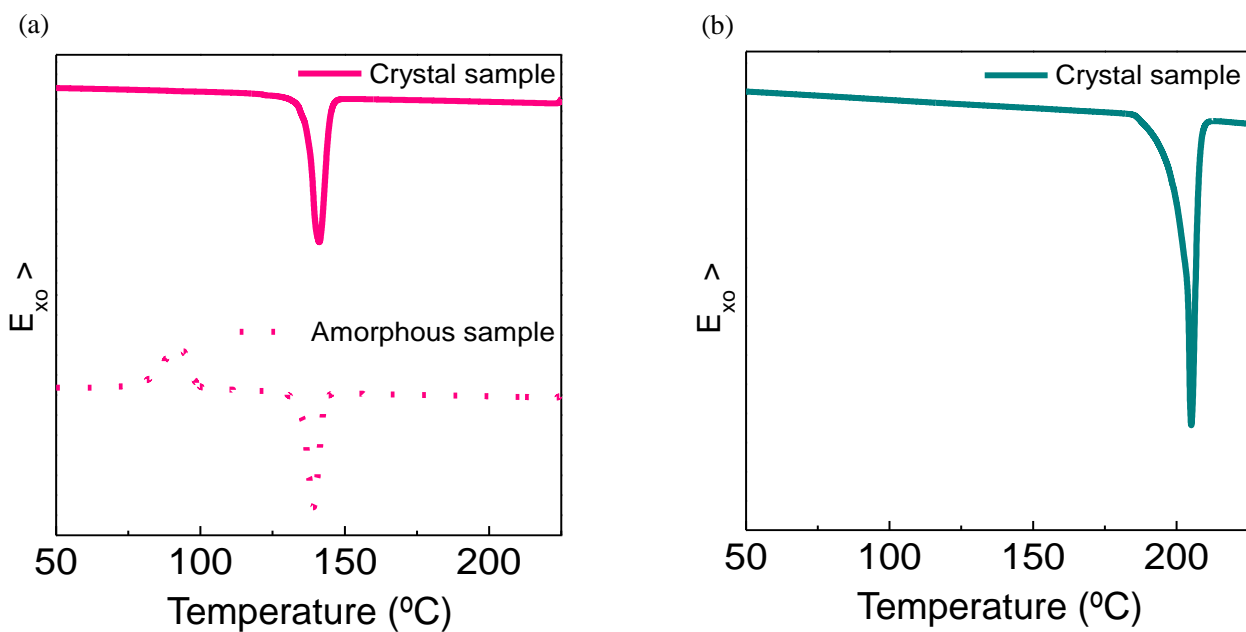

**Figure S11.** DSC profiles of (a) **BPI** and (b) **FBPI**.

**Table S6.** Thermal properties of **BPI** and **FBPI**

|             | $T_{5d}^a$ | $T_{cr}$ | $T_m$ |
|-------------|------------|----------|-------|
| <b>BPI</b>  | 256        | 92       | 141   |
| <b>FBPI</b> | 312        | -        | 205   |

<sup>a</sup>Decomposition temperature with 5 wt% weight losses.

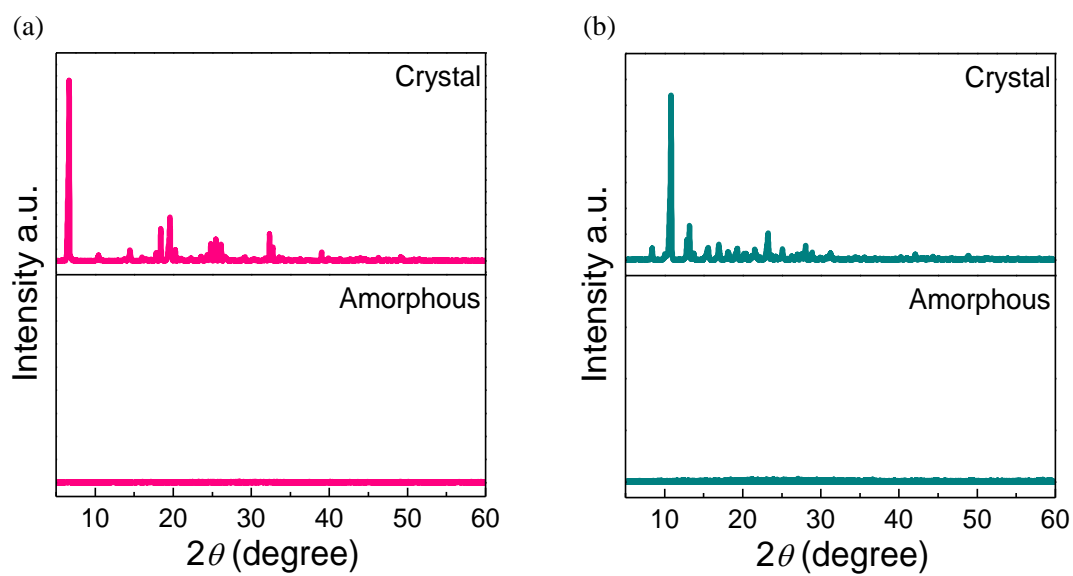

**Figure S12.** XRD patterns of (a) **BPI** and (b) **FBPI** crystalline and amorphous states.

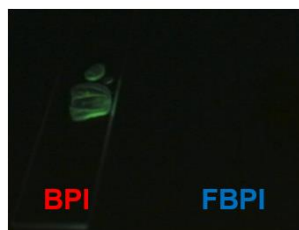

**Figure S13.** Photographs of **BPI** and **FBPI** in the amorphous state under UV irradiation.

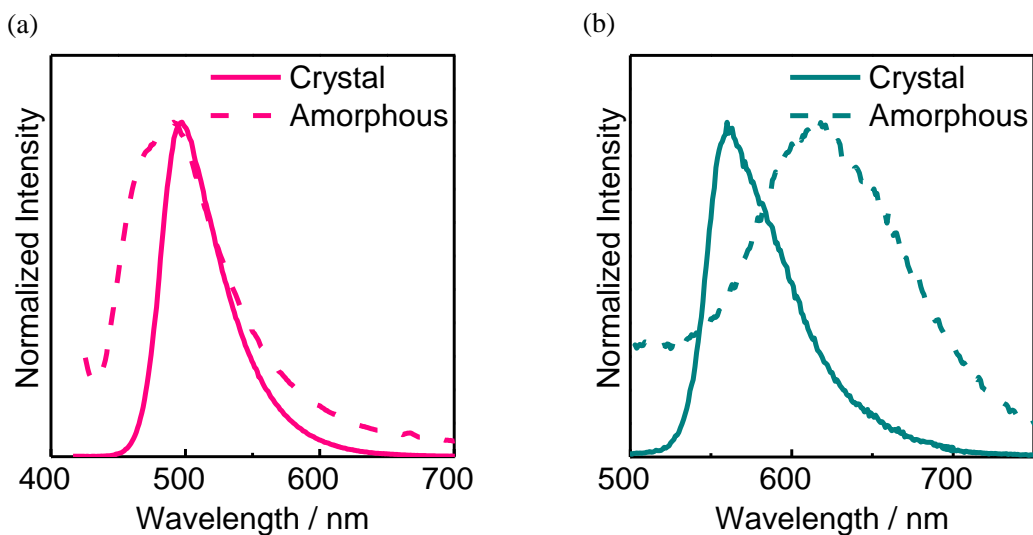

**Figure S14.** PL spectra of (a) **BPI** and (b) **FBPI** in crystalline and amorphous states.

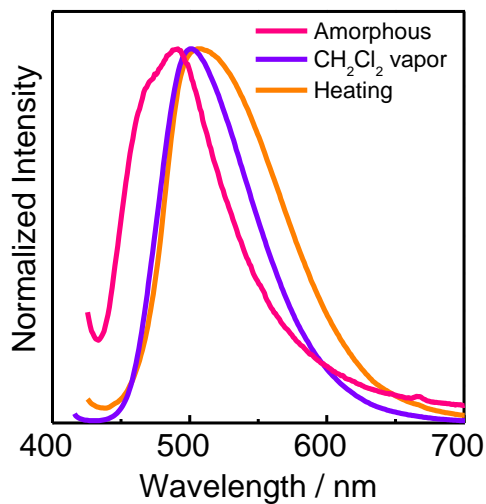

**Figure S15.** PL spectra of amorphous and crystalline ( $\text{CH}_2\text{Cl}_2$  vapor or heating) samples of **BPI**.

**Table S7.** PL properties of amorphous and crystal ( $\text{CH}_2\text{Cl}_2$  vapor or heating) samples of **BPI**

|            | $\lambda_{\text{PL}}$<br>(amorphous)<br>[nm] | $\lambda_{\text{PL}}$<br>( $\text{CH}_2\text{Cl}_2$ vapor)<br>[nm] | $\lambda_{\text{PL}}$<br>(heating)<br>[nm] |
|------------|----------------------------------------------|--------------------------------------------------------------------|--------------------------------------------|
| <b>BPI</b> | 491                                          | 502                                                                | 506                                        |

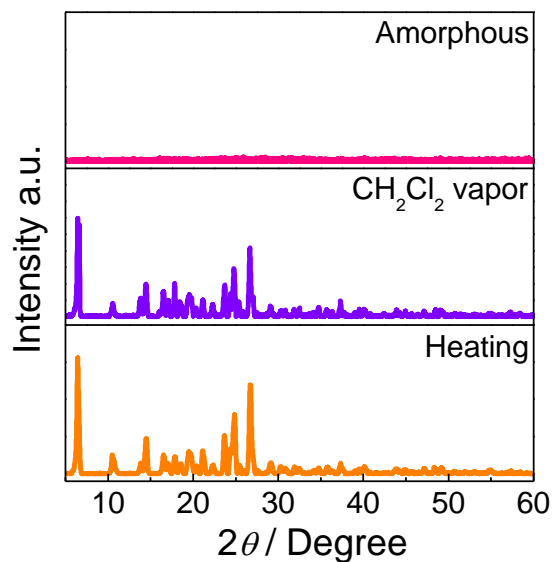

**Figure S16.** XRD patterns of amorphous and the treated (CH<sub>2</sub>Cl<sub>2</sub> vapor or heating) samples of **BPI**.

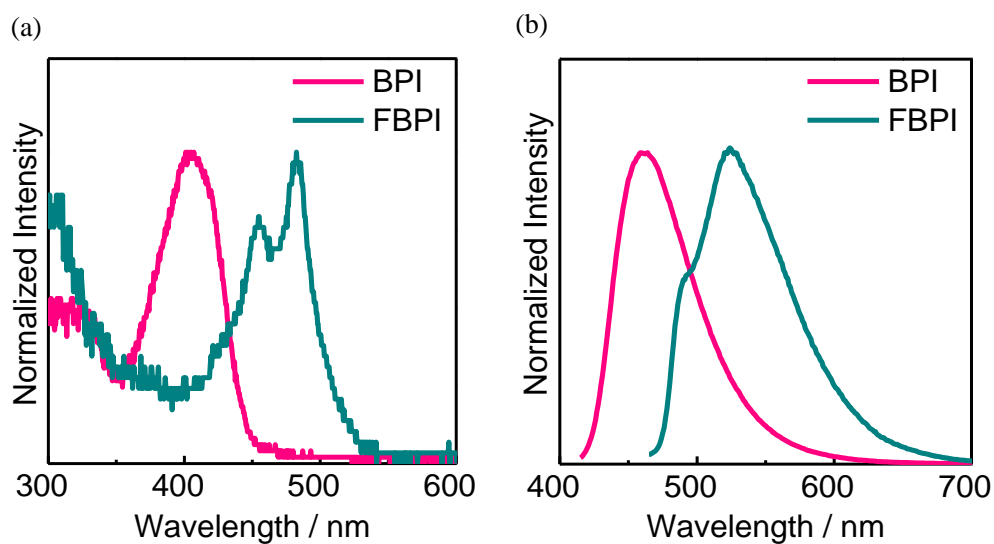

**Figure S17.** (a) UV-vis absorption and (b) PL spectra of **BPI** and **FBPI** in a polymer matrix (1 wt% in PMMA). (c) Photographs under UV irradiation.

**Table S8.** PL properties of **BPI** and **FBPI** in a polymer matrix

|             | $\lambda_{\text{abs}}$<br>[nm] | $\lambda_{\text{PL}}$<br>[nm] | $\Phi_{\text{PL}}^c$ | $\tau^d$<br>[ns]               |
|-------------|--------------------------------|-------------------------------|----------------------|--------------------------------|
| <b>BPI</b>  | 404                            | 464 <sup>a</sup>              | 0.31                 | 2.72<br>(52%)<br>5.78<br>(48%) |
| <b>FBPI</b> | 483                            | 520 <sup>b</sup>              | 0.35                 | 3.2<br>(44%)<br>5.87<br>(56%)  |

<sup>a</sup> Excited at  $\lambda_{\text{abs}}$ .<sup>b</sup> Excited at 453 nm.<sup>c</sup> Determined as an absolute value.<sup>d</sup> Excited at 375 nm.

## References

- 1) Higashi, T. ABSCOR. Program for Absorption Correction.; Rigaku Corporation: Japan, **1995**.
- 2) Sheldrick, G. M. SHELX-97. Programs for Crystal Structure Analysis; University of Göttingen: Germany, **1997**.
- 3) Altomare, A.; Burla, M. C.; Camalli, M.; Cascarano, G. L.; Giacovazzo, C.; Guagliardi, A.; Moliterni, A. G. G.; Polidori, G.; Spagna, R. *J. Appl. Cryst.* **1999**, *32*, 115.
- 4) Wakita, Y. Yadokari-XG. Program for Crystal Structure Analysis.; **2000**.
- 5) Farrugia, L. *J. Appl. Cryst.* **1997**, *30*, 565.
- 6) Chen, C.-P.; Chan, S.-H.; Chao, T.-C.; Ting, C.; Ko, B.-T. *J. Am. Chem. Soc.* **2008**, *130*, 12828.
